# Supplementary material for: Second-generation colon capsule endoscopy for detection of colorectal polyps: Systematic review and meta-analysis of clinical trials
Source: PubMed Central journal article supplement — Endosc Int Open. 2021 Apr 12;9(4):E562–71. doi: 10.1055/a-1353-4849 (PMC8041571; doi:10.1055/a-1353-4849), 2021-04-12

## Supplementary material

**Table A1** Search strategy for the systematic literature search.

| Categories [AND]        | Search terms [OR]                                                                                                                                                                                   |
|-------------------------|-----------------------------------------------------------------------------------------------------------------------------------------------------------------------------------------------------|
| Colon                   | Colon[MeSH], colon[Title/Abstract], colorectal[Title/Abstract], rectum[Title/Abstract]                                                                                                              |
| Polyps                  | Colonic polyps[MeSH], polyps[MeSH], polyp*[Title/Abstract], lesion[Title/Abstract], adenoma[MeSH], adenoma[Title/Abstract], adenomatous[Title/Abstract], neoplasia[Title/Abstract], Neoplasm*[MeSH] |
| Colon capsule endoscopy | Colon capsule endoscopy[Title/Abstract], capsule endoscopy[Title/Abstract], capsule endoscopy[MeSH]                                                                                                 |

**Table A2** Risk of bias inf included studies.

| Author, year        | Risk of bias                                                                        |                                                                                     |                                                                                     |                                                                                       |
|---------------------|-------------------------------------------------------------------------------------|-------------------------------------------------------------------------------------|-------------------------------------------------------------------------------------|---------------------------------------------------------------------------------------|
|                     | Patient selection                                                                   | Index test                                                                          | Reference standard                                                                  | Flow and Timing                                                                       |
| Rex, 2015           |  |  |  |  |
| Voska, 2019         |  |  |  |  |
| Holleran, 2014      |  |  |  |  |
| Rondonotti, 2014    |  |  |  |  |
| Kobaek-Larsen, 2017 |  |  |  |  |
| Pecere, 2019        |  |  |  |  |
| Parodi, 2018        |  |  |  |  |
| Kroijer, 2019       |  |  |  |  |
| Eliakim, 2009       |  |  |  |  |
| Spada, 2011         |  |  |  |  |
| Hagel, 2014         |  |  |  |  |
| Morgan, 2016        |  |  |  |  |

The study of Adrian-de-Ganzo et al was not evaluated with QUADAS-2 as it was not a diagnostic accuracy study.

 Low risk of bias.

 High risk of bias.

 Unclear risk of bias.

## Supplementary material

**Table A3** Study-related adverse events for CCE and OC examinations.

| Author, year               | Mild adverse events (n, %) | Related to (n, %) |          |           | Moderate/serious adverse events (n) | Related to (n, %) |         |
|----------------------------|----------------------------|-------------------|----------|-----------|-------------------------------------|-------------------|---------|
|                            |                            | Bowel preparation | CCE      | OC        |                                     | CCE               | OC      |
| Rex, 2015 [19]             | 142 (20.6)                 | 128 (90.1)        | 3 (2.1)  | 11 (7.7)  | 0                                   | -                 | -       |
| Voska, 2019 [22]           | 6 (2.7)                    | 2 (33.3)          | -        | 4 (66.6)  | 0                                   | -                 | -       |
| Holleran, 2014 [14]        | 0 (0)                      | -                 | -        | -         | 1                                   | -                 | 1 (100) |
| Rondonotti, 2014 [24]      | 0 (0)                      | -                 | -        | -         | 0                                   | -                 | -       |
| Kobaek-Larsen, 2017 [21]   | 0 (0)                      | -                 | -        | -         | 7                                   | -                 | 7 (100) |
| Pecere, 2019 [23]          | 45 (25.3)                  | 45 (100)          | -        | -         | 0                                   | -                 | -       |
| Adrian-de-Ganzo, 2015 [25] | 4 (1.7)                    | -                 | 1 (25.0) | 3 (75.0)  | 0                                   | -                 | -       |
| Parodi, 2018 [26]          | 15 (8.5)                   | -                 | 9 (60)   | 6 (40)    | 0                                   | -                 | -       |
| Kroijer, 2019 [27]         | 12 (6.7)                   | 12 (100)          | -        | -         | 0                                   | -                 | -       |
| Eliakim, 2009 [20]         | 7 (7.1)                    | 7 (100)           | -        | -         | 0                                   | -                 | -       |
| Spada, 2011 [28]           | 8 (7.3)                    | 5 (62.5)          | 2 (25.0) | 1 (12.5)  | 0                                   | -                 | -       |
| Hagel, 2014 [18]           | 1 (4.2)                    | 1 (100)           | -        | -         | 0                                   | -                 | -       |
| Morgan, 2016 [29]          | 0 (0)                      | -                 | -        | -         | 0                                   | -                 | -       |
| Total                      | 240 (10.3)                 | 200 (83.3)        | 15 (6.3) | 25 (10.4) | 8                                   | -                 | 8 (100) |

CCE, colon capsule endoscopy; OC, optical colonoscopy.

## Supplementary material

Table A4 Sensitivity and specificity of CCE in included studies.

| Author, year                            | Sensitivity (%) |                 |                 |                | Specificity (%) |            |                 |                  |                 |
|-----------------------------------------|-----------------|-----------------|-----------------|----------------|-----------------|------------|-----------------|------------------|-----------------|
|                                         | Any polyps      | Polyps ≥ 6 mm   | Polyps ≥ 10 mm  | Adenoma ≥ 6 mm | Adenoma ≥ 10 mm | Any polyps | Polyps ≥ 6 mm   | Polyps ≥ 10 mm   | Adenoma ≥ 10 mm |
| Rex, 2015 [19]                          | -               | 87              | 85              | 91             | 92              | -          | 94              | 97               | 95              |
| Voska, 2019 [22]                        | 82              | 79              | 88              | -              | 100             | 86         | 97              | 99               | 98              |
| Holleran, 2014 [14]                     | 95              | -               | 89              | -              | -               | 65         | -               | 96               | -               |
| Rondonotti, 2014 [24]                   | -               | 88              | 93              | -              | -               | -          | 88              | 92               | -               |
| Kobaek-Larsen, 2017 [21]*               | -               | -               | 87 <sup>a</sup> | -              | -               | -          | -               | 92 <sup>a</sup>  | -               |
| Pecere, 2019 [23]                       | -               | -               | -               | 81             | 85              | -          | -               | -                | -               |
| Adrian-de-Ganzo, 2015 [25] <sup>†</sup> | -               | -               | -               | -              | -               | -          | -               | -                | -               |
| Parodi, 2018 [26]                       | -               | 91              | 89              | 95             | 91              | -          | 88              | 95               | 92              |
| Kroijer, 2019 [27]                      | 88 <sup>§</sup> | -               | -               | -              | -               | -          | -               | -                | -               |
| Eliakim, 2009 [20]                      | -               | 89              | 88              | -              | -               | -          | 76              | 89               | -               |
| Spada, 2011 [28]                        | -               | 84              | 88              | 90             | 93              | -          | 64              | 95               | -               |
| Hagel, 2014 [18]                        | 82              | 72 <sup>c</sup> | 75 <sup>c</sup> | -              | -               | 86         | 91 <sup>‡</sup> | 100 <sup>‡</sup> | -               |
| Morgan, 2016 [29]                       | -               | 93              | 100             | -              | -               | -          | 80              | 93               | -               |

\* Polyps &gt; 9 mm.

<sup>†</sup> Parallel study groups for CCE & OC, no per-patient or per-polyp analysis possible.<sup>‡</sup> Per-polyp analysis.

## Supplementary material

**Fig. A1** Funnel plots for publication bias of studies with polyps  $\geq 6$  mm (A,  $n=7$ ) and  $\geq 10$  mm (B,  $n=9$ ).

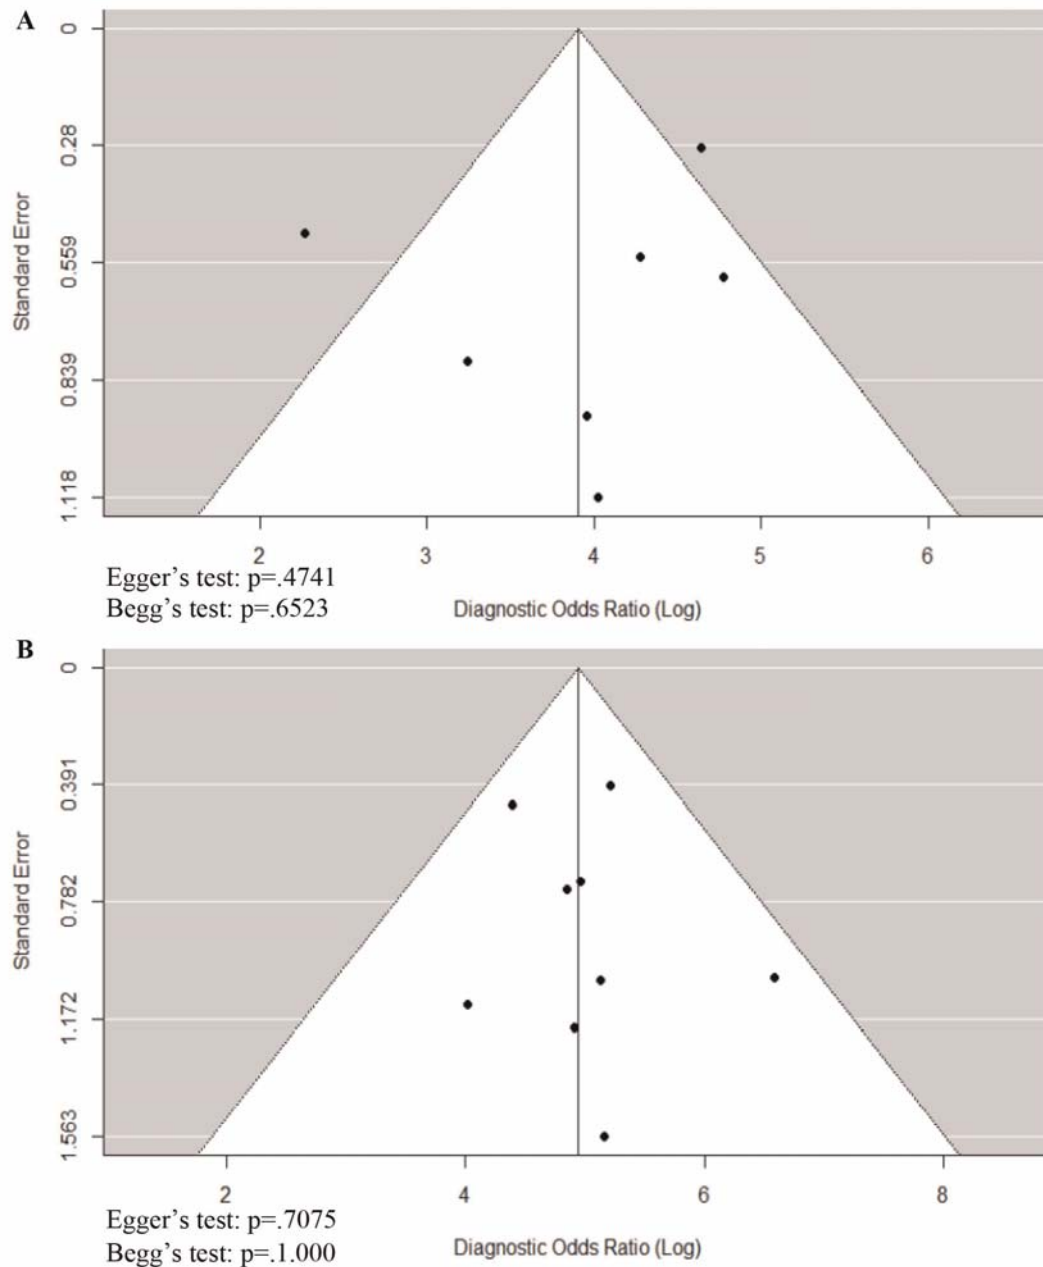

## Supplementary material

Fig. A2 Pooled diagnostic odds ratios for polyps  $\geq 6$  mm (A) and  $\geq 10$  mm (B).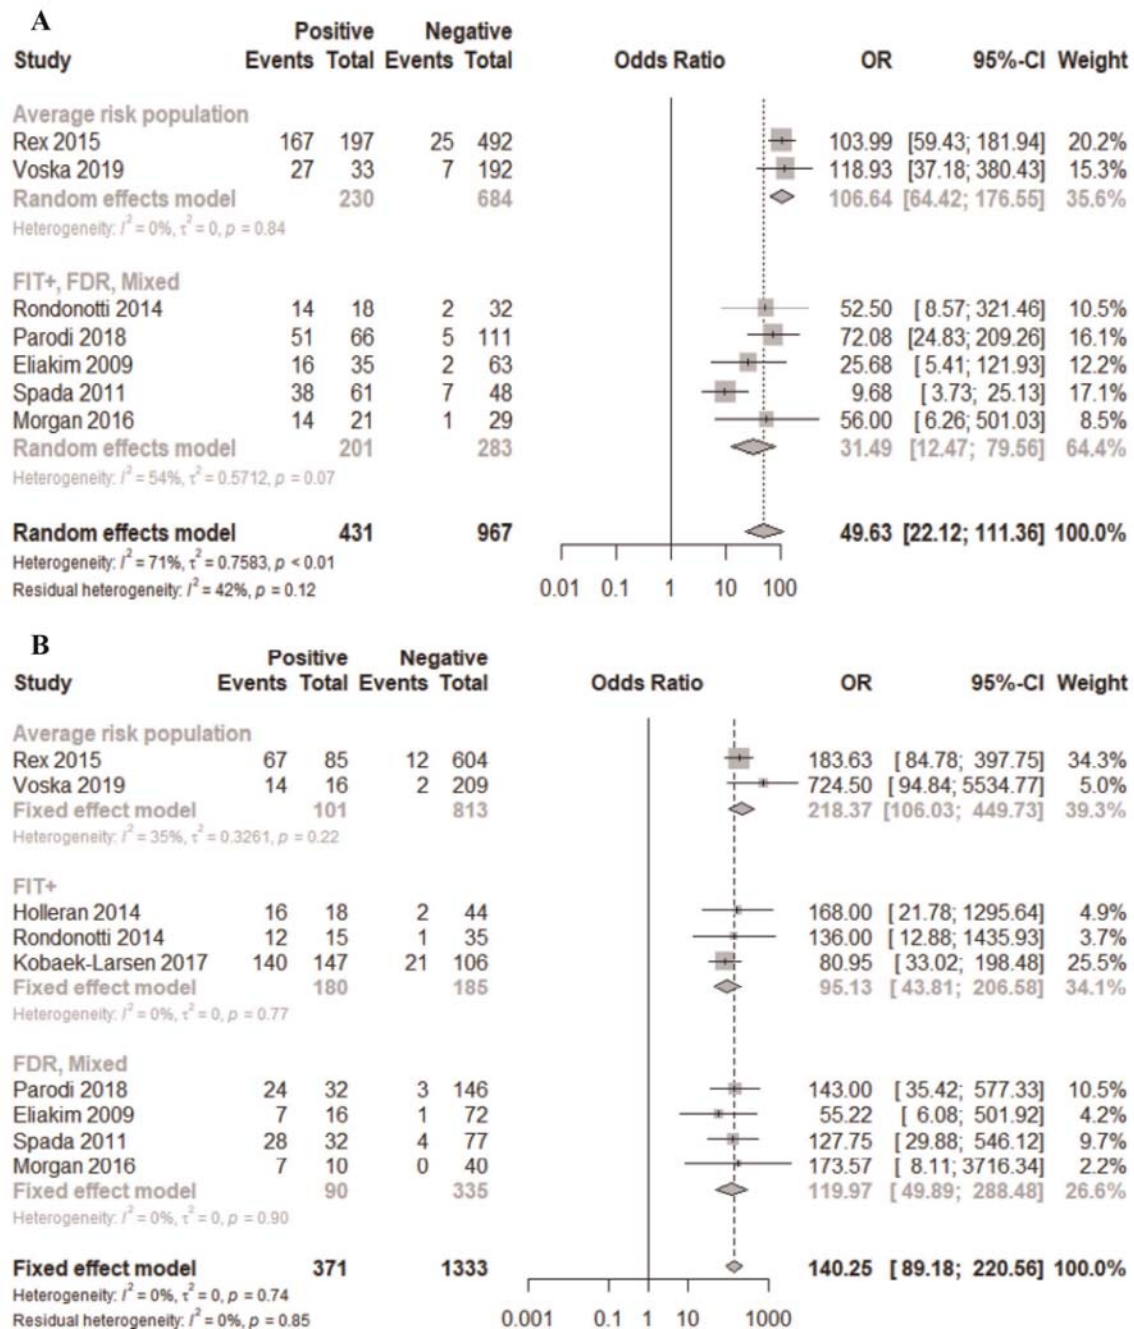

Supplement: 2039supmat_10-1055-a-1353-4849.pdf [file 2039supmat_10-1055-a-1353-4849.pdf]
